# Supplementary material for: A DFT Study on the Molecular Mechanism of Additions of Electrophilic and Nucleophilic Carbenes to Non-Enolizable Cycloaliphatic Thioketones
Source: MDPI journal article supplement (doi:10.3390/molecules26185562), 2021-09-13
Supplement: s1 [file s1]

---

## SUPPLEMENTARY MATERIALS

---

### A DFT study on the molecular mechanism of additions of electrophilic and nucleophilic carbenes to non-enolizable cycloaliphatic thioketones

Grzegorz Mlostoń <sup>1,\*</sup>, Karolina Kula <sup>2</sup>, Radomir Jasiński <sup>2,\*</sup>

<sup>1</sup> Department of Organic and Applied Chemistry  
University of Łódź, Tamka 12, PL-91-403 Łódź, Poland  
grzegorz.mloston@chemia.uni.lodz.pl

<sup>2</sup> Institute of Organic Chemistry & Technology  
Cracow University of Technology  
Warszawska 24, PL-31-155 Krakow, Poland  
kkula@chemia.pk.edu.pl (K.K.)  
radomir@chemia.pk.edu.pl (R.J.)

---

## INDEX

- 3      **Table S1** – Eyring parameters of reactions carbene **1a** and thione **2a** (wb97xd/ 6-311g(d,p)(PCM), chloroform).
- 3      **Table S2** – Eyring parameters of reactions thione **1a** and thione **2b** (wb97xd/ 6-311g(d,p)(PCM), chloroform).
- 3      **Table S3** – Eyring parameters of reactions carbene **1a** and thione **2c** (wb97xd/ 6-311g(d,p)(PCM), chloroform).
- 4      **Table S4** – Eyring parameters of reactions carbene **1a** and thione **2d** (wb97xd/ 6-311g(d,p)(PCM), chloroform).

- 4 **Table S5** – Eyring parameters of reactions thione **2a** and carbenes **1b-d** (wb97xd/6-311g(d,p)(PCM), chloroform).
- 4 **Table S6** – Selected parameters of key structures for carbenes **1a-d** (wb97xd/ 6-311g(d,p)(PCM), chloroform).
- 5 **Table S7 and S8** – Selected parameters of key structures for reaction between carbene **1a** and thione **2a** (wb97xd/6-311g(d,p)(PCM), chloroform).
- 5 **Table S9 and S10** – Selected parameters of key structures of reaction between carbene **2a** and thione **1b** (wb97xd/6-311g(d,p)(PCM), chloroform).
- 6 **Table S11** – Selected parameters of key structures for reaction between carbene **2a** and thiones **1c-d** (wb97xd/6-311g(d,p)(PCM), chloroform).
- 6 **Table S12** – Selected parameters of key structures of reaction between carbenes **1b-d** and thione **2a** (wb97xd/6-311g(d,p)(PCM), chloroform).

**Table S1.** Kinetic and thermodynamic parameters of reaction between carbene **1a** and thione **2a** in chloroform solution, according to wb97xd/6-311g(d,p)(PCM) calculations ( $\Delta H$  and  $\Delta G$  values are giving in kcal/mol<sup>-1</sup>;  $\Delta S$  values are giving in cal/mol<sup>-1</sup> K<sup>-1</sup>).

| Transition              | $\Delta H$ | $\Delta G$ | $\Delta S$ |
|-------------------------|------------|------------|------------|
| <b>1a + 2a → TS1A</b>   | -2.0       | 9.9        | -39.8      |
| <b>1a + 2a → 7aa</b>    | -15.9      | -3.4       | -41.9      |
| <b>7aa → TS2A</b>       | 10.3       | 12.1       | -6.0       |
| <b>7aa → 8aa</b>        | -51.6      | -49.0      | -8.7       |
| <b>8aa + 1a → TS1A2</b> | -2.1       | 9.8        | -39.7      |
| <b>8aa + 1a → 9aa</b>   | -14.3      | -1.8       | -42.0      |
| <b>9aa → TS2A2cis</b>   | 8.9        | 10.5       | -5.2       |
| <b>9aa → cis-3aa</b>    | -51.0      | -48.9      | -7.3       |
| <b>9aa → TS2A2trans</b> | 10.5       | 12.1       | -5.4       |
| <b>9aa → trans-3aa</b>  | -48.7      | -45.7      | -9.8       |

**Table S2.** Kinetic and thermodynamic parameters of reaction between carbene **1a** and thione **2b** in chloroform solution, according to wb97xd/6-311g(d,p) (PCM) calculations ( $\Delta H$  and  $\Delta G$  values are giving in kcal/mol<sup>-1</sup>;  $\Delta S$  values are giving in cal/mol<sup>-1</sup> K<sup>-1</sup>).

| Transition            | $\Delta H$ | $\Delta G$ | $\Delta S$ |
|-----------------------|------------|------------|------------|
| <b>1a + 2b → TS1A</b> | -2.2       | 9.9        | -40.5      |
| <b>1a + 2b → 7ab</b>  | -16.8      | -4.3       | -41.7      |
| <b>7ab → TS2A</b>     | 11.2       | 13.4       | -7.3       |

|                       |       |       |       |
|-----------------------|-------|-------|-------|
| <b>7ab → 8ab</b>      | -51.2 | -48.8 | -8.1  |
| <b>1a + 2b → TSC</b>  | 5.1   | 18.1  | -43.5 |
| <b>1a + 2b → 10ab</b> | -52.7 | -38.2 | -48.8 |

**Table S3.** Kinetic and thermodynamic parameters of reaction between carbene **1a** and thione **2c** in chloroform solution, according to wb97xd/6-311g(d,p)(PCM) calculations ( $\Delta H$  and  $\Delta G$  values are giving in kcal/mol<sup>-1</sup>;  $\Delta S$  values are giving in cal/mol<sup>-1</sup> K<sup>-1</sup>).

| <b>Transition</b>     | <b><math>\Delta H</math></b> | <b><math>\Delta G</math></b> | <b><math>\Delta S</math></b> |
|-----------------------|------------------------------|------------------------------|------------------------------|
| <b>1a + 2c → TS1A</b> | -3.1                         | 8.7                          | -39.4                        |
| <b>1a + 2c → 7ac</b>  | -15.1                        | -3.4                         | -39.1                        |
| <b>7ac → TS2A</b>     | 9.1                          | 11.8                         | -9.1                         |
| <b>7ac → 8ac</b>      | -51.4                        | -47.7                        | -12.4                        |

**Table S4.** Kinetic and thermodynamic parameters of reaction between carbene **1a** and thione **2d** in chloroform solution, according to wb97xd/6-311g(d,p) (PCM) calculations ( $\Delta H$  and  $\Delta G$  values are giving in kcal/mol<sup>-1</sup>;  $\Delta S$  values are giving in cal/mol<sup>-1</sup> K<sup>-1</sup>).

| <b>Transition</b>     | <b><math>\Delta H</math></b> | <b><math>\Delta G</math></b> | <b><math>\Delta S</math></b> |
|-----------------------|------------------------------|------------------------------|------------------------------|
| <b>1a + 2d → TS1A</b> | -3.2                         | 8.8                          | -40.4                        |
| <b>1a + 2d → 7ad</b>  | -11.7                        | 0.1                          | -39.6                        |
| <b>7ad → TS2A</b>     | 6.6                          | 9.1                          | -8.4                         |
| <b>7ad → 8ad</b>      | -47.3                        | -43.8                        | -11.6                        |

**Table S5.** Kinetic and thermodynamic parameters of reaction between thione **2a** and carbenes **1b-d** in chloroform solution, according to wb97xd/6-311g(d,p) (PCM) calculations ( $\Delta H$  and  $\Delta G$  values are giving in kcal/mol<sup>-1</sup>;  $\Delta S$  values are giving in cal/mol<sup>-1</sup> K<sup>-1</sup>).

| <b>Transition</b>     | <b><math>\Delta H</math></b> | <b><math>\Delta G</math></b> | <b><math>\Delta S</math></b> |
|-----------------------|------------------------------|------------------------------|------------------------------|
| <b>1b + 2a → TS1A</b> | -2.3                         | 8.9                          | -37.4                        |
| <b>1b + 2a → 7ba</b>  | -18.6                        | -6.7                         | -39.8                        |
| <b>7ba → TS2A</b>     | 10.5                         | 12.6                         | -7.0                         |
| <b>7ba → 8ba</b>      | -48.7                        | -45.7                        | -10.2                        |
| <b>1c + 2a → TSB</b>  | 10.2                         | 23.1                         | -43.2                        |
| <b>1c + 2a → 8ca</b>  | -53.6                        | -38.9                        | -49.5                        |
| <b>1d + 2a → TSB</b>  | 3.0                          | 16.5                         | -45.2                        |
| <b>1d + 2a → 8da</b>  | -53.8                        | -39.4                        | -48.6                        |

**Table S6.** Selected parameters of carbenes **1a-d**  
(wb97xd/6-311g(d,p)(PCM), chloroform).

| Structure | Fragment | Interatomic distances [Å] |
|-----------|----------|---------------------------|
| <b>1a</b> | C—Cl     | 1.725                     |
| <b>1b</b> | C—Br     | 1.883                     |
| <b>1c</b> | C—F      | 1.299                     |
| <b>1d</b> | C—OMe    | 1.317                     |

**Table S7.** Selected parameters of key structures of the reaction between carbene **1a** and thione **2a** to create **8aa** (wb97xd/6-311g(d,p)(PCM), chloroform).

| Structure   | Interatomic distances [Å] |       |       | GEDT<br>[e] |
|-------------|---------------------------|-------|-------|-------------|
|             | C1-S2                     | S2-C3 | C1-C3 |             |
| <b>2a</b>   |                           | 1.611 |       |             |
| <b>TS1A</b> | 2.501                     | 1.615 | 3.638 | 0.287       |
| <b>7aa</b>  | 1.646                     | 1.623 | 2.808 |             |
| <b>TS2A</b> | 1.685                     | 1.679 | 2.447 | 0.000       |
| <b>8aa</b>  | 1.785                     | 1.844 | 1.478 |             |

**Table S8.** Selected parameters of key structures of the reaction between thione **8aa** and carbene **1a** to create *cis*-**3aa** and *trans*-**3aa** (wb97xd/6-311g(d,p)(PCM), chloroform).

| Structure                    | Interatomic distances [Å] |       |       | GEDT<br>[e] |
|------------------------------|---------------------------|-------|-------|-------------|
|                              | C4-S5                     | S5-C6 | C4-C6 |             |
| <b>8aa</b>                   |                           | 1.612 |       |             |
| <b>TS1A2</b>                 | 2.461                     | 1.617 | 3.631 | 0.309       |
| <b>9aa</b>                   | 1.650                     | 1.626 | 2.824 |             |
| <b>TS2A2<sub>cis</sub></b>   | 1.684                     | 1.681 | 2.468 | 0.000       |
| <i>cis</i> - <b>3aa</b>      | 1.783                     | 1.849 | 1.479 |             |
| <b>TS2A2<sub>trans</sub></b> | 1.685                     | 1.679 | 2.455 | 0.000       |
| <i>trans</i> - <b>3aa</b>    | 1.781                     | 1.849 | 1.482 |             |

**Table S9.** Selected parameters of key structures of the reaction between carbene **1a** and thione **2b** to create **7ab** (wb97xd/6-311g(d,p)(PCM), chloroform).

| Structure   | Interatomic distances [Å] |       |       | GEDT [e] |
|-------------|---------------------------|-------|-------|----------|
|             | C1-S2                     | S2-C3 | C1-C3 |          |
| <b>2b</b>   |                           | 1.612 |       |          |
| <b>TS1A</b> | 2.545                     | 1.615 | 3.678 | 0.265    |
| <b>7ab</b>  | 1.647                     | 1.622 | 2.805 |          |
| <b>TS2A</b> | 1.685                     | 1.679 | 2.443 | 0.000    |
| <b>8ab</b>  | 1.786                     | 1.846 | 1.476 |          |

**Table S10.** Selected parameters of key structures of the reaction between thione **8ab** and carbene **1a** to create **10ab** (wb97xd/6-311g(d,p)(PCM), chloroform).

| Structure   | Interatomic distances [Å] |       |       | GEDT [e] |
|-------------|---------------------------|-------|-------|----------|
|             | C4-O5                     | O5-C6 | C4-C6 |          |
| <b>8ab</b>  |                           | 1.196 |       |          |
| <b>TSB</b>  | 2.336                     | 1.231 | 2.056 | 0.024    |
| <b>10ab</b> | 1.365                     | 1.447 | 1.454 |          |

**Table S11.** parameters of the

Selected of key structures of the reaction

between carbene **1a** and thiones **2c-d** and (wb97xd/6-311g(d,p)(PCM), chloroform).

| Thioketone                                                                          | Structure   | Interatomic distances [Å] |       |       | GEDT [e] |
|-------------------------------------------------------------------------------------|-------------|---------------------------|-------|-------|----------|
|                                                                                     |             | C1-S2                     | S2-C3 | C1-C3 |          |
| 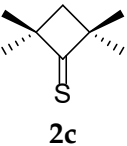 | <b>2c</b>   |                           | 1.618 |       |          |
|                                                                                     | <b>TS1A</b> | 2.706                     | 1.619 | 3.853 | 0.191    |
|                                                                                     | <b>7ac</b>  | 1.649                     | 1.626 | 2.824 |          |
|                                                                                     | <b>TS2A</b> | 1.682                     | 1.690 | 2.460 | 0.000    |
|                                                                                     | <b>8ac</b>  | 1.781                     | 1.857 | 1.478 |          |
|  | <b>2d</b>   |                           | 1.628 |       |          |
|                                                                                     | <b>TS1A</b> | 2.599                     | 1.633 | 3.881 | 0.230    |
|                                                                                     | <b>7ad</b>  | 1.652                     | 1.632 | 2.892 |          |
|                                                                                     | <b>TS2A</b> | 1.678                     | 1.703 | 2.457 | 0.000    |
|                                                                                     | <b>8ad</b>  | 1.774                     | 1.878 | 1.493 |          |

**Table S12.** Selected parameters of key structures of the reaction between carbenes **1b-d** and thione **2a** and (wb97xd/6-311g(d,p)(PCM), chloroform).

| Carbene                                   | Structure   | Interatomic distances [Å] |       |       | GEDT [e] |
|-------------------------------------------|-------------|---------------------------|-------|-------|----------|
|                                           |             | C1-S2                     | S2-C3 | C1-C3 |          |
| $\ddot{\text{C}}\text{Br}_2$<br><b>1b</b> | <b>2a</b>   |                           | 1.611 |       |          |
|                                           | <b>TS1A</b> | 2.645                     | 1.613 | 3.786 | 0.187    |
|                                           | <b>7ba</b>  | 1.648                     | 1.622 | 2.829 |          |
|                                           | <b>TS2A</b> | 1.688                     | 1.679 | 2.446 | 0.000    |

|                                              |            |       |       |       |       |
|----------------------------------------------|------------|-------|-------|-------|-------|
|                                              | <b>8ba</b> | 2.446 | 1.843 | 1.480 |       |
| $\ddot{\text{C}}\text{F}_2$<br><b>1c</b>     | <b>2a</b>  |       | 1.611 |       |       |
|                                              | <b>TSB</b> | 2.795 | 1.659 | 2.152 | 0.107 |
|                                              | <b>7ca</b> | 1.783 | 1.861 | 1.460 |       |
| $\ddot{\text{C}}(\text{OMe})_2$<br><b>1d</b> | <b>2a</b>  |       | 1.611 |       |       |
|                                              | <b>TSB</b> | 3.011 | 1.649 | 2.404 | 0.188 |
|                                              | <b>8da</b> | 1.867 | 1.842 | 1.469 |       |

The global electron density transfer (GEDT) values were designated based on the formula:

$$\text{GEDT} = + \sum q_A$$

where  $q_A$  is the net Mulliken charge, and the sum is performed over all the atoms of carbenes **1a-d**.
